# Supplementary material for: miR-34a as hub of T cell regulation networks
Source: PubMed Central journal article supplement (PMC6636054; doi:10.1186/s40425-019-0670-5), 2019-07-16
Supplement: 40425_2019_670_MOESM1_ESM.pdf [file 40425_2019_670_MOESM1_ESM.pdf]

## **Supplementary material files**

### **Supplementary Figure 1: Analysis of miR-34a-5p over-expression by qRT-PCR.**

Primary CD4<sup>+</sup> T cells were transfected either with allstars negative control (ANC) or miR-34a-5p mimic. 48 h post transfection the total RNA was isolated and analyzed by qRT-PCR using a specific hsa-miR-34a-5p primer.

### **Supplementary Figure 2: FACS Controls**

CD4<sup>+</sup> T cells were stained for CD4 and co-stained for CD11A or the respective isotype controls for 30 min at 4°C. Cells were analyzed by flow cytometry. Gated CD4<sup>+</sup> T cells (A) were analyzed for CD11A expression (B, dark grey) in comparison to isotype controls (light grey).

CD8<sup>+</sup> T cells were stained for CD8 and co-stained for CD11A or the respective isotype controls for 30 min at 4°C. Cells were analyzed by flow cytometry. Gated CD8<sup>+</sup> T cells (C) were analyzed for CD11A expression (D, dark grey) in comparison to isotype controls (light grey).

# Figure S1

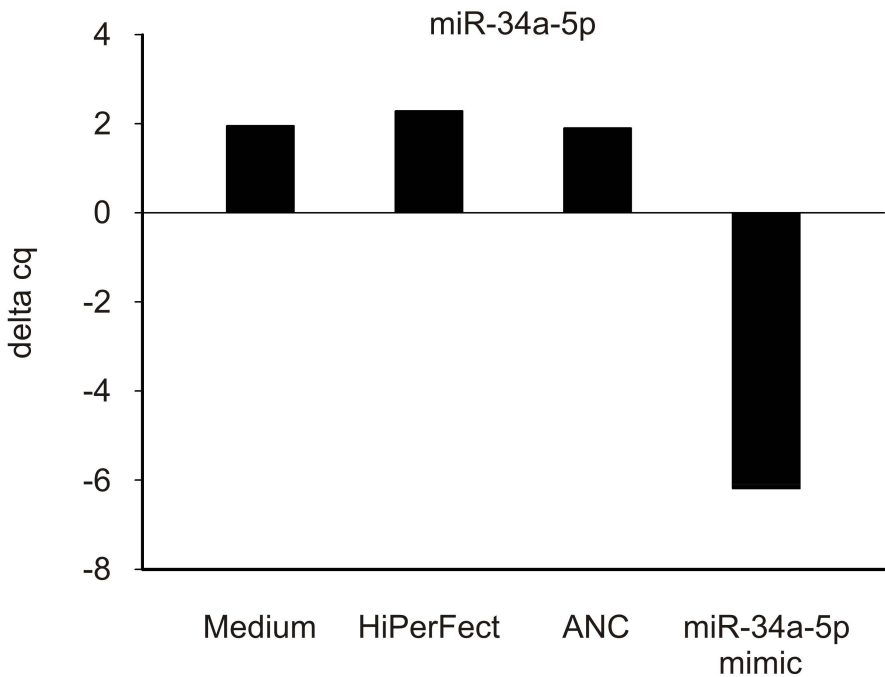

# Figure S2

## A

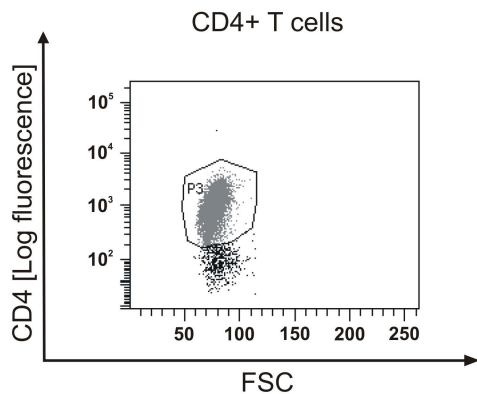

## B

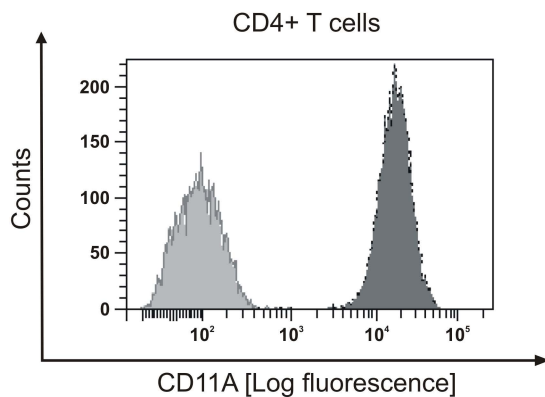

## C

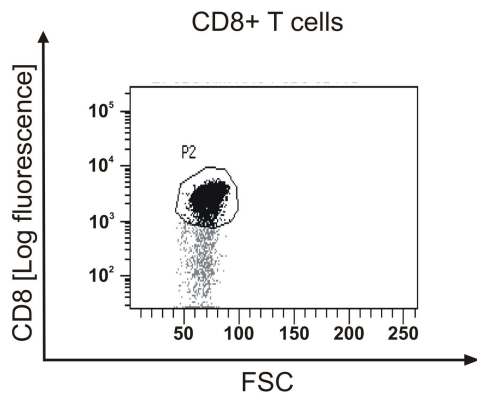

## D

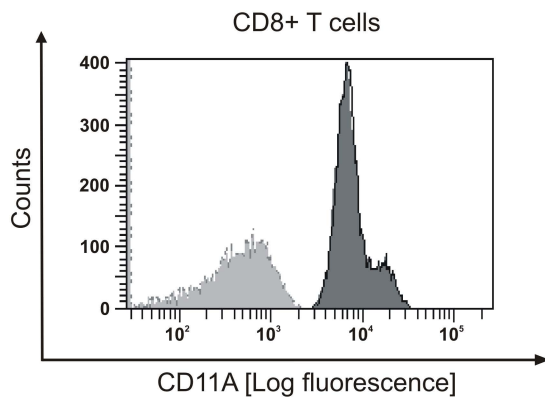

# Supplementary Table 1

| target gene | ID             | cloning primers                  | sequence<br>(restriction sites are underlined)                                     |
|-------------|----------------|----------------------------------|------------------------------------------------------------------------------------|
| VAMP2       | NM_014232.2    | 5'-VAMP2-SpeI<br>3'-VAMP2-NaeI   | <u>ggactag</u> tccatcatcctcatcatcatc<br>gccggcctcaatcagttcacccaatgag               |
| IKBKE       | NM_014002.3    | 5'-IKBKE-SpeI<br>3'-IKBKE-SacI   | <u>ggactag</u> tcacatgagggcatcctgaag<br>cgagctcgcatagaagaacaggaggctc               |
| MYH9        | NM_002473.5    | 5'-MYH9-SpeI<br>3'-MYH9-SacI     | <u>ggactag</u> tcgaagaggtagatggcaaagc<br>cgagctccctttgtgacagcaactggg               |
| MARCH8      | NM_001282866.1 | 5'-MARCH8-SpeI<br>3'-MARCH8-SacI | <u>ggactag</u> tgtgtgcggtgtgcatcttc<br>cgagctccagaatgcactgagagtggg                 |
| KLRK1       | NM_007360.3    | 5'-KLRK1-SpeI<br>3'-KLRK1-SacI   | <u>ggactag</u> tgagactgtgcactctatgcctc<br>cgagctcccttcttaactgtgaacctgtg            |
| CD11A       | NM_002209.2    | 5'-CD11A-SpeI<br>3'-CD11A-SacI   | <u>ggactag</u> tgagaaggactctgagagtgg<br>cgagctcctctaactcctgacctcagggtg             |
| TRAFD1      | NM_001143906.1 | 5'-TRAFD1-SpeI<br>3'-TRAFD1-SacI | <u>ggactag</u> tcacatcggttccctgtctctgtg<br>cgagctcctgacacttggtttcagagc             |
| CCR1        | NM_001295.2    | 5'-CCR1-SpeI<br>3'-CCR1-NaeI     | <u>ggactag</u> tctgactcagaccataggagg<br>gccggcctcctacatcaacacagaatc                |
| PYDC1       | NM_152901.3    | 5'-PYDC1-SpeI<br>3'-PYDC1-SacI   | <u>ggactag</u> tgacatgcatgctgttgag<br>cgagctcccataaatatttatgggcagtgaagaataaatgacag |
| PRF1        | NM_001083116.1 | 5'-PRF1-SpeI<br>3'-PRF1-SacI     | <u>ggactag</u> tgaacagtgagcttgaaaagg<br>cgagctccaaagaagacagagcagctg                |
| PIK3R2      | NM_005027.3    | 5'-PIK3R2-SpeI<br>3'-PIK3R2-SacI | <u>ggactag</u> tctgtctctcctccatggtggg<br>cgagctccaacgtaccgtacaaaacctg              |
| PIK3CD      | NM_001350234.1 | 5'-PIK3CD-SpeI<br>3'-PIK3CD-SacI | <u>ggactag</u> tgaccaagcacattgggtcc<br>cgagctcgggtttcacagagtgtgggtc                |
| AP1B1       | NM_001127.3    | 5'-AP1B1-SpeI<br>3'-AP1B1-SacI   | <u>ggactag</u> tcacctcaagaactgagacc<br>cgagctcgatctagtaccgtagggtc                  |
| ADAM10      | NM_001110.3    | 5'-ADAM10-SpeI<br>3'-ADAM10-SacI | <u>ggactag</u> tgtgttccctgttcttctgtg<br>cgagctcccacatcttgattcgcagtgg               |
| PVR         | NM_006505.4    | 5'-PVR-SpeI<br>3'-PVR-SacI       | <u>ggactag</u> tgaccccaatggatgaagac<br>cgagctcgtgggttatttccctgccagtc               |
| AP2S1       | NM_001301076.1 | 5'-AP1B1-SpeI<br>3'-AP1B1-SacI   | <u>ggactag</u> tgaacagctgctgatgtctac<br>cgagctcgacggcaaggccaggaccaggtttattgg       |
| BAD         | NM_004322.3    | 5'-BAD-SpeI<br>3'-BAD-SacI       | <u>gactagt</u> cagctggacgcgagtcttcc<br>cgagctccatttggtagtgacagc                    |
| ICOS        | NM_012092.3    | 5'-ICOS-SpeI<br>3'-ICOS-SacI     | <u>ggactag</u> tcatgagagcagtgaaacacag<br>cgagctccgggtatagctgacagcaacc              |
| CD247       | NM_198053.2    | 5'-CD247-SpeI<br>3'-CD247-NaeI   | <u>ggactag</u> tctacctgctggatggaatcc<br>gccggcggtcagctctgttcatcttctgg              |
| ZPF36       | NM_003407.3    | 5'-ZPF36-SpeI<br>3'-ZPF36-SacI   | <u>ggactag</u> tcgcatctctgttctctgagtg<br>cgagctcccagcttaactcagattg                 |
| STX8        | NM_004853.2    | 5'-STX8-SpeI<br>3'-STX8-SacI     | <u>ggactag</u> tcagaaagtcagcctcttctg<br>cgagctccagagcttgggggaatttattgagag          |
| SPN         | NM_001030288.2 | 5'-SPN-SpeI<br>3'-SPN-SacI       | <u>ggactag</u> tgtgtcggatgaatagtgaggc<br>cgagctcctccagactctggccaac                 |

## Supplementary Table 2: predicted miR-34a target genes

| predicted targets<br>in immune system<br>process |
|--------------------------------------------------|
| DLL1                                             |
| PRKCQ                                            |
| CACNB3                                           |
| ARIH2                                            |
| EFNB1                                            |
| ESRRA                                            |
| KLRK1                                            |
| HOXB4                                            |
| MYH9                                             |
| SERPINE1                                         |
| CALCR                                            |
| ADAM10                                           |
| CDK6                                             |
| CALCOCO2                                         |
| NDRG1                                            |
| LYST                                             |
| CRHR1                                            |
| PVR                                              |
| DPP4                                             |
| SWAP70                                           |
| CXCL10                                           |
| KIT                                              |
| KITLG                                            |
| NFKBIA                                           |
| NUB1                                             |
| PKNOX1                                           |
| PAG1                                             |
| PURB                                             |
| PVRL1                                            |
| CCL22                                            |
| SNCA                                             |
| VCAM1                                            |
| ZFP36                                            |
| CAV1                                             |
| TOB2                                             |
| FSTL3                                            |
| CEACAM8                                          |
| TRAFD1                                           |
| GPR44                                            |
| CHRN2                                            |
| RASGRP4                                          |
| CCR1                                             |
| ANKRD54                                          |
| CRP                                              |
| CX3CR1                                           |
| VAMP2                                            |
| CYP11B1                                          |

|                                                  |
|--------------------------------------------------|
| predicted targets<br>in immune system<br>process |
| CFD                                              |
| EDN2                                             |
| RTKN2                                            |
| ICOSLG                                           |
| DDX58                                            |
| PYDC1                                            |
| GBP2                                             |
| GCH1                                             |
| B4GALT1                                          |
| POLL                                             |
| HLA-DQA1                                         |
| HLX                                              |
| HMGB1                                            |
| TLX1                                             |
| TMEM173                                          |
| AP1B1                                            |
| IFI35                                            |
| IKBKB                                            |
| IL1R1                                            |
| AQP3                                             |
| IRAK2                                            |
| ITPKB                                            |
| KCNJ8                                            |
| ARHGDIB                                          |
| MARCH8                                           |
| LTF                                              |
| MITF                                             |
| ATM                                              |
| OAS3                                             |
| GLRX5                                            |
| PDGFB                                            |
| PML                                              |
| STX8                                             |
| TOLLIP                                           |
| PRKCA                                            |
| CXCL16                                           |
| RFX1                                             |
| BCL6                                             |
| SMAP1                                            |
| ROCK1                                            |
| CXCL11                                           |
| CXCL5                                            |
| PRDM16                                           |
| SELPLG                                           |
| SPN                                              |
| TAL1                                             |
| TGFBR2                                           |
| TGFBR3                                           |
| TLR4                                             |

|                                                  |
|--------------------------------------------------|
| predicted targets<br>in immune system<br>process |
| WNT2B                                            |
| TFEB                                             |
| ROGDI                                            |
| ICOS                                             |
| NLRC5                                            |
| TN-                                              |
| FRSF14                                           |
| BCL10                                            |
| CCND3                                            |
| MAP3K14                                          |
| RSAD2                                            |
| IL1RL1                                           |
| CD247                                            |
| GPR55                                            |
| CD28                                             |
| CXCL14                                           |
| GTPBP1                                           |
| CD47                                             |
| CD97                                             |
| P2RY14                                           |
| RC3H1                                            |
| PIK3CD                                           |
| SARM1                                            |
| IRF1                                             |
| JARID2                                           |
| SP2                                              |
| TACR1                                            |
| WNT1                                             |
| BCL2                                             |
| TRIM10                                           |
| CPLX2                                            |
| AP2S1                                            |
| ADD2                                             |
| ADK                                              |
| CR2                                              |
| NFAM1                                            |
| IL28RA                                           |
| POLR3H                                           |
| FKBP1B                                           |
| JMJD6                                            |
| IL1RN                                            |
| PIK3R2                                           |
| IL6R                                             |
| INPP5D                                           |
| KIR2DL1                                          |
| KIR3DL1                                          |
| CD46                                             |
| NOTCH4                                           |
| FOXP3                                            |

|                                                  |
|--------------------------------------------------|
| predicted targets<br>in immune system<br>process |
| ENPP1                                            |
| PLCG1                                            |
| SOX6                                             |
| CTNNBIP1                                         |
| <b>BAD</b>                                       |
| SATB1                                            |
| TCF7                                             |
| THRA                                             |
| C1QC                                             |
| UNG                                              |
| VEGFA                                            |
| XBP1                                             |
| <b>PRF1</b>                                      |
| CBFA2T3                                          |
| ACVR1B                                           |
| CD3E                                             |
| CD86                                             |
| CD44                                             |
| ABCC9                                            |
| SEMA4D                                           |
| MS4A2                                            |
| SIT1                                             |
| IRF4                                             |
| <b>ITGAL</b>                                     |
| JAK2                                             |
| LY9                                              |
| LY75                                             |
| SMAD3                                            |
| MLL                                              |
| OSM                                              |
| MASP1                                            |
| ST6GAL1                                          |
| BMP6                                             |
| TCF12                                            |
| TPD52                                            |
| CALCA                                            |
| ULBP2                                            |
| <b>IKBKE</b>                                     |
| SH2B3                                            |
| PATZ1                                            |
| MAPK1                                            |
| NOTCH2                                           |
| PODXL                                            |
| ITCH                                             |
| JAG1                                             |
| NOTCH1                                           |
| BCL11B                                           |
| SOX4                                             |



**Supplementary Table 3: validated miR-34a target genes**

| <b>miRTarBase ID</b> | <b>miRNA</b>   | <b>validated Target Gene</b> | <b>Experiments</b>                                                                        | <b>Support Type</b> | <b>References (PMID)</b> |
|----------------------|----------------|------------------------------|-------------------------------------------------------------------------------------------|---------------------|--------------------------|
| MIRT000074           | hsa-miR-34a-5p | JAG1                         | Luciferase reporter assay//qRT-PCR//Western blot                                          | Functional MTI      | 20351093                 |
| MIRT000074           | hsa-miR-34a-5p | JAG1                         | Flow//Immunoblot//Luciferase reporter assay//Microarray//qRT-PCR                          | Functional MTI      | 19398721                 |
| MIRT000074           | hsa-miR-34a-5p | JAG1                         | Flow//In situ hybridization//Luciferase reporter assay//Microarray//qRT-PCR//Western blot | Functional MTI      | 24307639                 |
| MIRT001010           | hsa-miR-34a-5p | CCND3                        | Western blot                                                                              | Non-Functional MTI  | 18406353                 |
| MIRT001012           | hsa-miR-34a-5p | CDK6                         | qRT-PCR//Luciferase reporter assay//Western blot//Reporter assay                          | Functional MTI      | 18406353                 |
| MIRT001012           | hsa-miR-34a-5p | CDK6                         | Luciferase reporter assay                                                                 | Functional MTI      | 19461653                 |
| MIRT001012           | hsa-miR-34a-5p | CDK6                         | qRT-PCR//Western blot//Luciferase reporter assay                                          | Functional MTI      | 19584398                 |

| <b>miRTarBase ID</b> | <b>miRNA</b>   | <b>validated Target Gene</b> | <b>Experiments</b>                                               | <b>Support Type</b>   | <b>References (PMID)</b> |
|----------------------|----------------|------------------------------|------------------------------------------------------------------|-----------------------|--------------------------|
| MIRT001012           | hsa-miR-34a-5p | CDK6                         | Luciferase reporter assay//Western blot//Microarray              | Functional MTI        | 17914404                 |
| MIRT001012           | hsa-miR-34a-5p | CDK6                         | Luciferase reporter assay//qRT-PCR//Western blot                 | Functional MTI        | 19773441                 |
| MIRT001012           | hsa-miR-34a-5p | CDK6                         | Western blot;Other                                               | Functional MTI        | 21240262                 |
| MIRT001012           | hsa-miR-34a-5p | CDK6                         | qRT-PCR//Western blot                                            | Functional MTI        | 23035210                 |
| MIRT001012           | hsa-miR-34a-5p | CDK6                         | PAR-CLIP                                                         | Functional MTI (Weak) | 23592263                 |
| MIRT001231           | hsa-miR-34a-5p | WNT1                         | Luciferase reporter assay                                        | Functional MTI        | 19336450                 |
| MIRT001231           | hsa-miR-34a-5p | WNT1                         | Flow//Immunoblot//Luciferase reporter assay//Microarray//qRT-PCR | Functional MTI        | 19398721                 |
| MIRT001231           | hsa-miR-34a-5p | WNT1                         | Luciferase reporter assay//qRT-PCR//Western blot                 | Functional MTI        | 28199987                 |
| MIRT001757           | hsa-miR-34a-5p | DLL1                         | Luciferase reporter assay                                        | Functional MTI        | 14697198                 |
| MIRT001757           | hsa-miR-34a-5p | DLL1                         | Luciferase reporter assay                                        | Functional MTI        | 19461653                 |
| MIRT001757           | hsa-miR-34a-5p | DLL1                         | Luciferase reporter assay                                        | Functional MTI        | 20144220                 |
| MIRT001757           | hsa-miR-34a-5p | DLL1                         | Luciferase reporter assay//qRT-PCR//Western blot                 | Functional MTI        | 23327670                 |

| <b>miRTarBase ID</b> | <b>miRNA</b>   | <b>validated Target Gene</b> | <b>Experiments</b>                                                                          | <b>Support Type</b>   | <b>References (PMID)</b> |
|----------------------|----------------|------------------------------|---------------------------------------------------------------------------------------------|-----------------------|--------------------------|
| MIRT002298           | hsa-miR-34a-5p | BCL2                         | Luciferase reporter assay//qRT-PCR//Western blot                                            | Functional MTI        | 18803879                 |
| MIRT002298           | hsa-miR-34a-5p | BCL2                         | Luciferase reporter assay//qRT-PCR//Western blot//Reporter assay;Western blot;qRT-PCR;Other | Functional MTI        | 19683563                 |
| MIRT002298           | hsa-miR-34a-5p | BCL2                         | qRT-PCR//Western blot//Luciferase reporter assay                                            | Functional MTI        | 18505919                 |
| MIRT002298           | hsa-miR-34a-5p | BCL2                         | Luciferase reporter assay                                                                   | Functional MTI        | 19461653                 |
| MIRT002298           | hsa-miR-34a-5p | BCL2                         | Luciferase reporter assay//Western blot//Microarray                                         | Functional MTI        | 17914404                 |
| MIRT002298           | hsa-miR-34a-5p | BCL2                         | Luciferase reporter assay//Microarray//Western blot                                         | Functional MTI        | 17656095                 |
| MIRT002298           | hsa-miR-34a-5p | BCL2                         | Flow//Immunoblot//Luciferase reporter assay//Reporter assay                                 | Functional MTI        | 20598588                 |
| MIRT002298           | hsa-miR-34a-5p | BCL2                         | Reporter assay;Other                                                                        | Functional MTI        | 21399894                 |
| MIRT002298           | hsa-miR-34a-5p | BCL2                         | Proteomics                                                                                  | Functional MTI (Weak) | 21566225                 |
| MIRT002298           | hsa-miR-34a-5p | BCL2                         | qRT-PCR//Western blot                                                                       | Functional MTI        | 24565525                 |
| MIRT002298           | hsa-miR-34a-5p | BCL2                         | Luciferase reporter assay                                                                   | Functional MTI        | 23862748                 |

| <b>miRTarBase ID</b> | <b>miRNA</b>   | <b>validated Target Gene</b> | <b>Experiments</b>                                                                                     | <b>Support Type</b>   | <b>References (PMID)</b> |
|----------------------|----------------|------------------------------|--------------------------------------------------------------------------------------------------------|-----------------------|--------------------------|
| MIRT002298           | hsa-miR-34a-5p | BCL2                         | qRT-PCR                                                                                                | Functional MTI (Weak) | 23292172                 |
| MIRT002298           | hsa-miR-34a-5p | BCL2                         | qRT-PCR                                                                                                | Functional MTI (Weak) | 26802970                 |
| MIRT002298           | hsa-miR-34a-5p | BCL2                         | qRT-PCR//Western blot                                                                                  | Functional MTI        | 27939626                 |
| MIRT002298           | hsa-miR-34a-5p | BCL2                         | Flow//QRTPCR//Western blot                                                                             | Functional MTI        | 26406332                 |
| MIRT002298           | hsa-miR-34a-5p | BCL2                         | Luciferase reporter assay//qRT-PCR//Western blot                                                       | Functional MTI        | 25910896                 |
| MIRT002875           | hsa-miR-34a-5p | NOTCH1                       | Luciferase reporter assay                                                                              | Functional MTI        | 14697198                 |
| MIRT002875           | hsa-miR-34a-5p | NOTCH1                       | Microarray                                                                                             | Functional MTI (Weak) | 19461653                 |
| MIRT002875           | hsa-miR-34a-5p | NOTCH1                       | Luciferase reporter assay//qRT-PCR//Western blot                                                       | Functional MTI        | 20351093                 |
| MIRT002875           | hsa-miR-34a-5p | NOTCH1                       | Luciferase reporter assay//qRT-PCR//Western blot                                                       | Functional MTI        | 19773441                 |
| MIRT002875           | hsa-miR-34a-5p | NOTCH1                       | Luciferase reporter assay//Microarray                                                                  | Functional MTI        | 17150773                 |
| MIRT002875           | hsa-miR-34a-5p | NOTCH1                       | Immunofluorescence//Immunohistochemistry//Luciferase reporter assay//Microarray//qRT-PCR//Western blot | Functional MTI        | 22363487                 |

| <b>miRTarBase ID</b> | <b>miRNA</b>   | <b>validated Target Gene</b> | <b>Experiments</b>                                            | <b>Support Type</b> | <b>References (PMID)</b> |
|----------------------|----------------|------------------------------|---------------------------------------------------------------|---------------------|--------------------------|
| MIRT002875           | hsa-miR-34a-5p | NOTCH1                       | Luciferase reporter assay//qRT-PCR//Western blot              | Functional MTI      | 22684561                 |
| MIRT002875           | hsa-miR-34a-5p | NOTCH1                       | Luciferase reporter assay                                     | Functional MTI      | 23085450                 |
| MIRT002875           | hsa-miR-34a-5p | NOTCH1                       | Western blot                                                  | Functional MTI      | 23226240                 |
| MIRT002875           | hsa-miR-34a-5p | NOTCH1                       | Microarray//Western blot                                      | Functional MTI      | 22438124                 |
| MIRT002875           | hsa-miR-34a-5p | NOTCH1                       | qRT-PCR//Western blot                                         | Functional MTI      | 23035210                 |
| MIRT002875           | hsa-miR-34a-5p | NOTCH1                       | qRT-PCR//Western blot                                         | Functional MTI      | 23430952                 |
| MIRT002875           | hsa-miR-34a-5p | NOTCH1                       | Luciferase reporter assay//Western blot                       | Functional MTI      | 28145431                 |
| MIRT002875           | hsa-miR-34a-5p | NOTCH1                       | Luciferase reporter assay//qRT-PCR//Western blot              | Functional MTI      | 26493107                 |
| MIRT002875           | hsa-miR-34a-5p | NOTCH1                       | ELISA//Flow//Luciferase reporter assay//qRT-PCR//Western blot | Functional MTI      | 28129650                 |
| MIRT004513           | hsa-miR-34a-5p | VEGFA                        | ELISA//Luciferase reporter assay                              | Non-Functional MTI  | 18320040                 |
| MIRT005029           | hsa-miR-34a-5p | NOTCH2                       | Luciferase reporter assay//qRT-PCR//Western blot              | Functional MTI      | 19773441                 |

| <b>miRTarBase ID</b> | <b>miRNA</b>   | <b>validated Target Gene</b> | <b>Experiments</b>                                                                            | <b>Support Type</b>   | <b>References (PMID)</b> |
|----------------------|----------------|------------------------------|-----------------------------------------------------------------------------------------------|-----------------------|--------------------------|
| MIRT005029           | hsa-miR-34a-5p | NOTCH2                       | Immunoblot//Immunocytochemistry//Luciferase reporter assay//Microarray//qRT-PCR//Western blot | Functional MTI        | 22363487                 |
| MIRT005480           | hsa-miR-34a-5p | CD44                         | Immunohistochemistry//qRT-PCR//Western blot//Reporter assay;Other                             | Functional MTI        | 21240262                 |
| MIRT005480           | hsa-miR-34a-5p | CD44                         | Luciferase reporter assay//qRT-PCR//Western blot                                              | Functional MTI        | 24423412                 |
| MIRT005480           | hsa-miR-34a-5p | CD44                         | qRT-PCR//Western blot                                                                         | Functional MTI        | 25572695                 |
| MIRT005480           | hsa-miR-34a-5p | CD44                         | Flow//qRT-PCR//Western blot                                                                   | Functional MTI        | 27497057                 |
| MIRT005480           | hsa-miR-34a-5p | CD44                         | qRT-PCR//Western blot                                                                         | Functional MTI        | 26231042                 |
| MIRT005480           | hsa-miR-34a-5p | CD44                         | Luciferase reporter assay//qRT-PCR//Western blot                                              | Functional MTI        | 25551284                 |
| MIRT006286           | hsa-miR-34a-5p | ULBP2                        | Flow//Luciferase reporter assay//Western blot                                                 | Functional MTI        | 22102694                 |
| MIRT006286           | hsa-miR-34a-5p | ULBP2                        | PAR-CLIP                                                                                      | Functional MTI (Weak) | 26701625                 |
| MIRT006869           | hsa-miR-34a-5p | CCL22                        | Luciferase reporter assay                                                                     | Functional MTI        | 22975373                 |
| MIRT025289           | hsa-miR-34a-5p | EFNB1                        | Proteomics                                                                                    | Functional MTI (Weak) | 21566225                 |

| <b>miRTarBase ID</b> | <b>miRNA</b>   | <b>validated Target Gene</b> | <b>Experiments</b>                                  | <b>Support Type</b>   | <b>References (PMID)</b> |
|----------------------|----------------|------------------------------|-----------------------------------------------------|-----------------------|--------------------------|
| MIRT025289           | hsa-miR-34a-5p | EFNB1                        | PAR-CLIP                                            | Functional MTI (Weak) | 23592263                 |
| MIRT025369           | hsa-miR-34a-5p | PLCG1                        | Proteomics                                          | Functional MTI (Weak) | 21566225                 |
| MIRT025409           | hsa-miR-34a-5p | NDRG1                        | Proteomics                                          | Functional MTI (Weak) | 21566225                 |
| MIRT025584           | hsa-miR-34a-5p | TPD52                        | Sequencing                                          | Functional MTI (Weak) | 20371350                 |
| MIRT025584           | hsa-miR-34a-5p | TPD52                        | Proteomics                                          | Functional MTI (Weak) | 21566225                 |
| MIRT307050           | hsa-miR-34a-5p | TGFBR2                       | PAR-CLIP                                            | Functional MTI (Weak) | 22012620                 |
| MIRT437939           | hsa-miR-34a-5p | ARHGDI3                      | Western blot//Luciferase reporter assay//           | Functional MTI        | 23349340                 |
| MIRT438239           | hsa-miR-34a-5p | KIT                          | Luciferase reporter assay//Western blot             | Functional MTI        | 24009080                 |
| MIRT438239           | hsa-miR-34a-5p | KIT                          | Luciferase reporter assay                           | Functional MTI        | 27056900                 |
| MIRT438704           | hsa-miR-34a-5p | IL6R                         | ChIP-seq//Immunofluorescence//qRT-PCR//Western blot | Functional MTI        | 24642471                 |
| MIRT438704           | hsa-miR-34a-5p | IL6R                         | Luciferase reporter assay//qRT-PCR//Western blot    | Functional MTI        | 25973020                 |
| MIRT438704           | hsa-miR-34a-5p | IL6R                         | Luciferase reporter assay                           | Functional MTI        | 26091352                 |
| MIRT535098           | hsa-miR-34a-5p | PODXL                        | PAR-CLIP                                            | Functional MTI (Weak) | 22012620                 |

| miRTarBase ID                                 | miRNA          | validated Target Gene | Experiments                                                            | Support Type          | References (PMID) |
|-----------------------------------------------|----------------|-----------------------|------------------------------------------------------------------------|-----------------------|-------------------|
| MIRT702573                                    | hsa-miR-34a-5p | JARID2                | HITS-CLIP                                                              | Functional MTI (Weak) | 23313552          |
| MIRT731117                                    | hsa-miR-34a-5p | TCF7                  | qRT-PCR//Luciferase reporter assay//Immunohistochemistry//Western blot | Functional MTI        | 25436980          |
| MIRT732534                                    | hsa-miR-34a-5p | CACNB3                | Immunocytochemistry//Luciferase reporter assay//Western blot           | Functional MTI        | 25623948          |
| MIRT732593                                    | hsa-miR-34a-5p | MAP3K14               | qRT-PCR                                                                | Functional MTI (Weak) | 25864118          |
| MIRT733801                                    | hsa-miR-34a-5p | NLRC5                 | Luciferase reporter assay//qRT-PCR//Western blot                       | Functional MTI        | 27423514          |
| MIRT733971                                    | hsa-miR-34a-5p | BCL10                 | PCR array                                                              | Functional MTI (Weak) | 28097098          |
| MIRT734565                                    | hsa-miR-34a-5p | FKBP1B                | Luciferase reporter assay                                              | Functional MTI        | 26471303          |
| MIRT741440                                    | hsa-miR-34a-5p | POLL                  | PAR-CLIP                                                               | Functional MTI (Weak) | 26701625          |
| miR-34a target genes validated by Hart et al. |                |                       |                                                                        |                       |                   |
| n.a.                                          | hsa-miR-34a-5p | PRKCQ                 | Luciferase reporter assay//Western blot                                | Functional MTI        | 27144431          |
| n.a.                                          | hsa-miR-34a-5p | PRKCA                 | Luciferase reporter assay//Western blot                                | Functional MTI        | 27144431          |
| n.a.                                          | hsa-miR-34a-5p | NFKBIA                | Luciferase reporter assay//Western blot                                | Functional MTI        | 30718475          |
| n.a.                                          | hsa-miR-34a-5p | CD3E                  | Luciferase reporter assay//FACS                                        | Functional MTI        | 30718475          |
